# Supplementary material for: Unusual thermal phase transition behavior of an ionic liquid and poly(ionic liquid) in water with significantly different LCST and dynamic mechanism
Source: Royal Society of Chemistry journal article supplement (doi:10.1039/c4py00593g), 2014-05-16
Supplement: c4py00593g1.pdf [file c4py00593g1.pdf]

## Supporting Information to

# Unusual Thermal Phase Transition Behavior of the Ionic Liquid and Poly Ionic Liquid in Water with Significantly Different LCST and Dynamic Mechanism

Wenlong Li, and Peiyi Wu\*

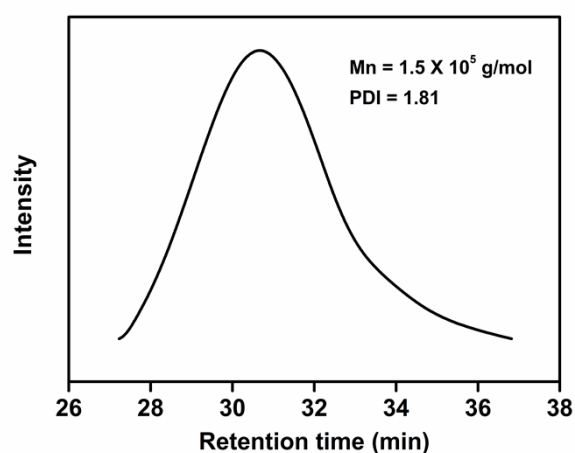

**Fig. S1** The number-average molecular weight ( $M_n$ ) and polydispersity index ( $PDI = M_w/M_n$ ) of the synthetic P[P<sub>4,4,4,4</sub>][SS].

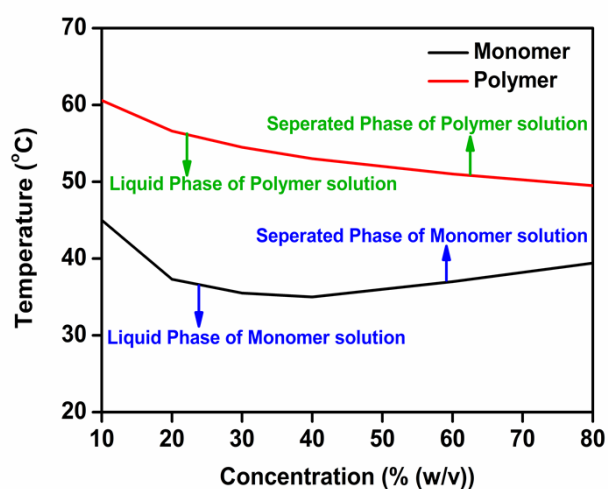

**Fig. S2** Phase diagram of Temperature vs. concentration for both monomer and polymer in water according to the DSC results.
